# Supplementary material for: A pH and reduction dual-sensitive polymeric nanomicelle for tumor microenvironment triggered cellular uptake and controlled intracellular drug release
Source: Royal Society of Chemistry journal article supplement (doi:10.1039/c9bm00825j), 2019-01-01
Supplement: c9bm00825j1.pdf [file c9bm00825j1.pdf]

# pH and Reduction Dual-Sensitive Polymeric Micelle for Tumor Microenvironment Triggered Cellular Uptake and Controlled Intracellular Drug Release

Zhenwei Su,<sup>‡a</sup> Yongmin Xu,<sup>‡a</sup> Yong Wang,<sup>a</sup> Wanqi Shi,<sup>a</sup> Shisong Han<sup>\*a,b</sup> and Xintao Shuai<sup>\*a</sup>

<sup>a</sup>PCFM Lab of Ministry of Education, School of Materials Science and Engineering, Sun Yat-sen University, Guangzhou 510275, China.

<sup>b</sup>Laboratory of Interventional Radiology, Department of Minimally Invasive Interventional Radiology, and Department of Radiology, the Second Affiliated Hospital of Guangzhou Medical University, Guangzhou, 510260, China.

<sup>‡</sup>These authors contributed equally.

\*Correspondence should be addressed to:

Shisong Han, Email: hanshs@qq.com

Xintao Shuai, Email: shuaixt@mail.sysu.edu.cn

**Table S1. Molecular weight characterization of the synthesized polymers**

| Polymer               | Mn <sup>a</sup> | Mn <sup>b</sup> | Mw/Mn <sup>b</sup> |
|-----------------------|-----------------|-----------------|--------------------|
| N-BOC-PBLA-CA         | 1200            | 1500            | 1.09               |
| mPEG-C=N-PAsp(MEA)-CA | 3600            | 4000            | 1.04               |

<sup>a</sup>Calculated by <sup>1</sup>H NMR; <sup>b</sup>calculated by CPC

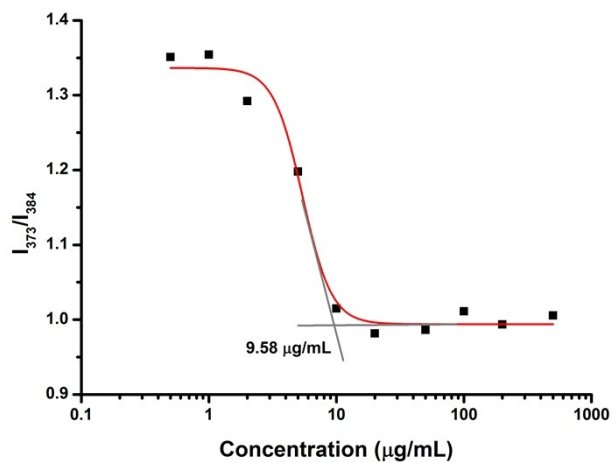

**Figure S1.** Determination of CMC value of the polymer mPEG-C=N-PAsp(MEA)-CA at pH 7.4.

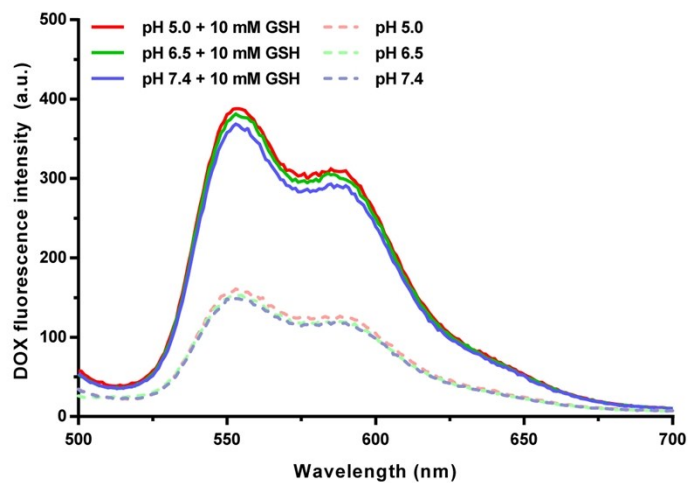

**Figure S2.** The fluorescence spectra of DOX-SCM after treated in PBS of different pH and GSH concentration for 1 h.

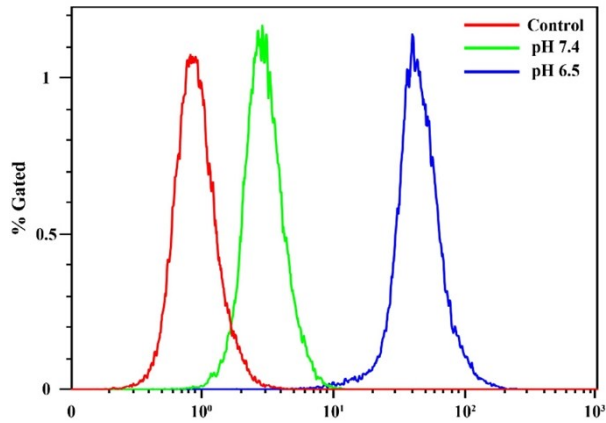

**Figure S3.** Cellular uptake efficiency of DOX-SCM by C6 cells at different pH determined by flow cytometry analysis.

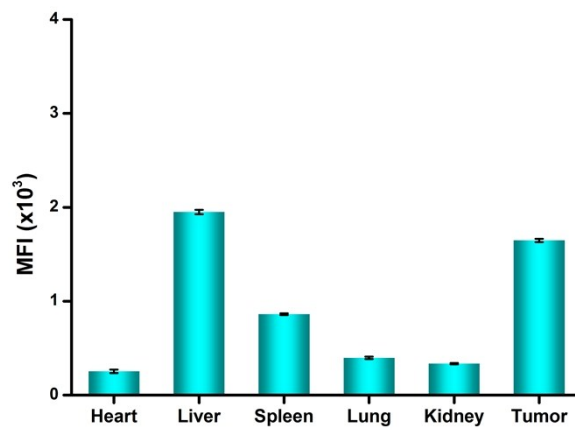

**Figure S4.** The semi-quantitative mean fluorescence intensity (MFI) analysis of different organs after 24 h treatment.
